# Supplementary material for: Bias-tunable two-dimensional magnetic and topological materials
Source: Royal Society of Chemistry journal article supplement (doi:10.1039/d1nr02641k), 2021-01-01
Supplement: d1nr02641k1.pdf [file d1nr02641k1.pdf]

**Supporting Information for**  
**Bias-tunable two-dimensional magnetic and topological materials**

Jie Li and Ruqian Wu\*

Department of Physics and Astronomy, University of California, Irvine, California 92697-4575,

USA.

\* E-mail: wur@uci.edu

## The detail of torque method

In the Torque method, the torque  $T(\theta)$  as a function of the polar angle  $\theta$  between the magnetization and the z is defined as,

$$T(\theta) = \frac{dE(\theta)}{d\theta} = \sum_{occ} \left\langle \psi_{ik} \left| \frac{\partial H_{so}}{\partial \theta} \right| \psi_{ik} \right\rangle \quad (1)$$

with the spin-orbit coupling (SOC) Hamiltonian  $H_{so} = \sum_i \xi(r_i) \hat{l}_i \cdot \hat{s}$ , and the summation goes over all occupied states. By integrating  $T(\theta)$ , we obtain the total energy  $E(\theta)$  as a function of the polar angle  $\theta$ , and the MAE is equal to the difference between the lowest and highest total energies.

|                    | Ti    | V     | Cr    | Mn    | Fe    | Co    | Ni    | Cu    | Zn    |
|--------------------|-------|-------|-------|-------|-------|-------|-------|-------|-------|
| M@C <sub>u</sub>   | 1.579 | 1.462 | 1.635 | 2.245 | 2.308 | 2.185 | 2.485 | 2.46  | 2.179 |
| M@C <sub>d</sub>   | 1.717 | 1.528 | 2.025 | 2.117 | 2.706 | 1.704 | 2.401 |       |       |
| M@H <sub>1-u</sub> | 0.87  | 1.272 | 1.516 | 2.494 | 1.883 | 2.369 | 2.567 | 2.97  | 2.71  |
| M@H <sub>1-d</sub> | 0.27  | 1.017 | 1.729 | 2.495 | 2.12  | 2.454 | 3.079 |       |       |
| M@H <sub>2-u</sub> | 0.616 | 1.229 | 1.452 | 2.33  | 1.7   | 2.311 | 2.439 | 2.835 | 2.55  |
| M@H <sub>2-d</sub> | 0.345 | 0.715 | 1.501 | 2.331 | 1.993 | 2.263 | 2.991 |       |       |

**Table S1.** The binding energies (eV) of M@C, M@H<sub>1</sub> and M@H<sub>2</sub> (M= Ti - Zn).

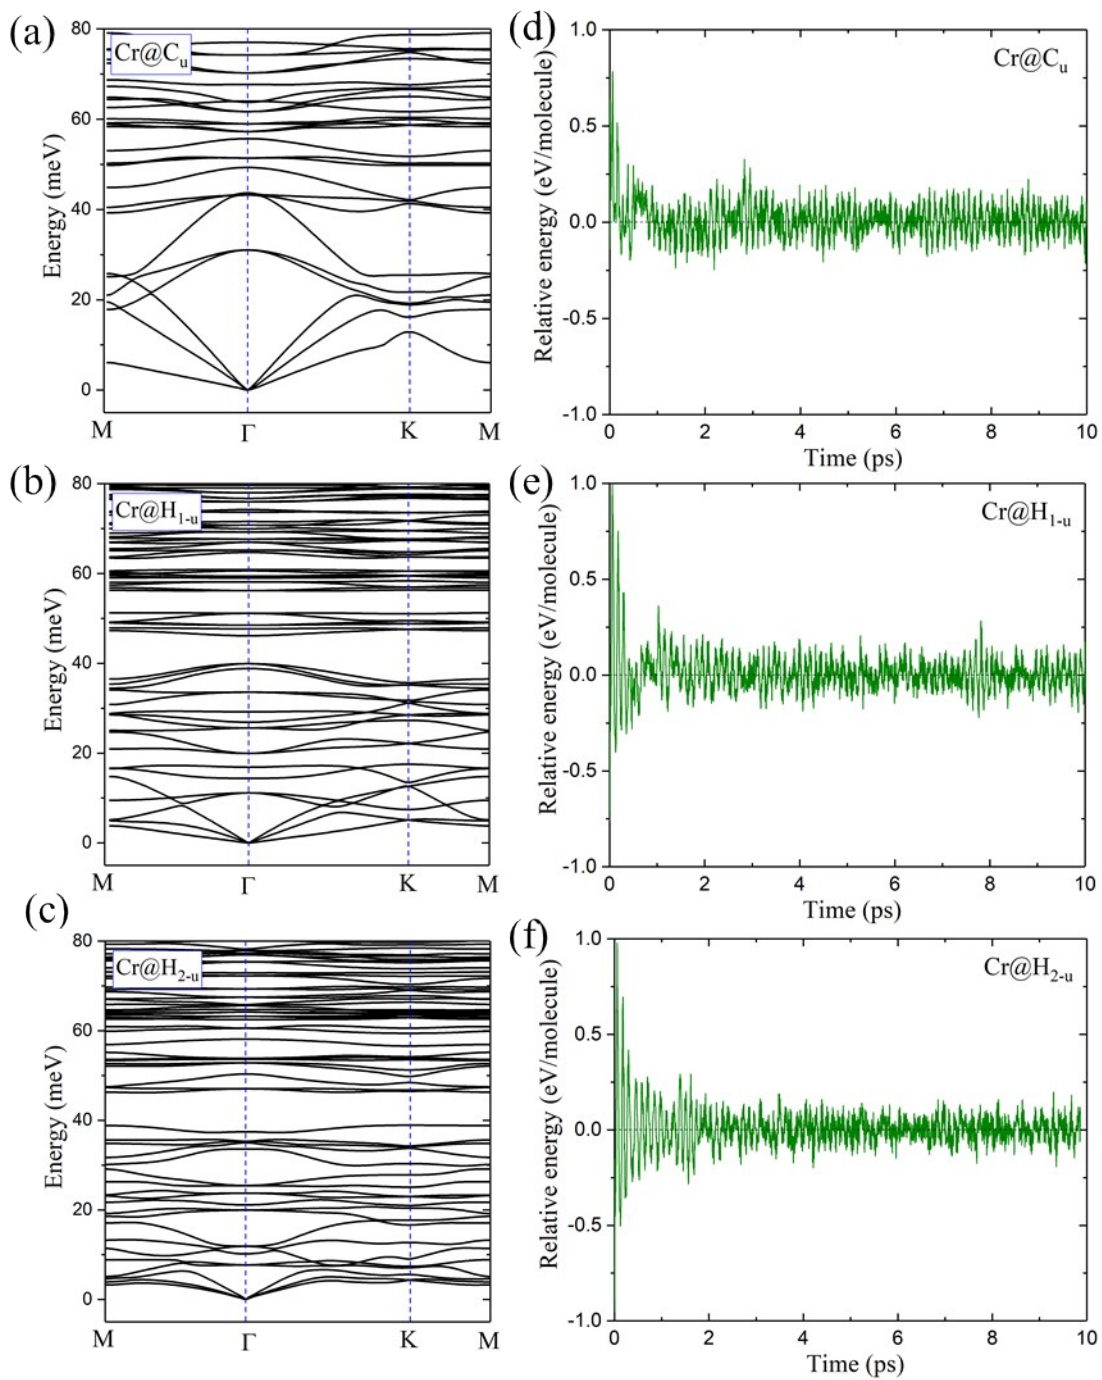

**Fig. S1** The phonon spectrum and the relative total energy as function of AIMD time for Cr@C<sub>u</sub>, Cr@H<sub>1-u</sub> and Cr@H<sub>2-u</sub>, respectively. (a), (d) for Cr@C<sub>u</sub>, (b), (e) for Cr@H<sub>1-u</sub>, (c), (f) for Cr@H<sub>2-u</sub>.

**Table S2.** The atomic displacements ( $\Delta d$ , in Å) of M@C, M@H<sub>1</sub> and M@H<sub>2</sub> (M= Ti-Ni).

|                  | Ti    | V    | Cr    | Mn    | Fe    | Co   | Ni   |
|------------------|-------|------|-------|-------|-------|------|------|
| M@C              | 0.02  | 0.03 | 0.001 | 0.01  | 0.001 | 0.49 | 0.82 |
| M@H <sub>1</sub> | 0.775 | 1.09 | 1.22  | 0.001 | 0.74  | 0.97 | 0.82 |
| M@H <sub>2</sub> | 0.40  | 1.08 | 0.40  | 0.001 | 0.33  | 0.94 | 0.77 |

**Table S3.** The height ( $h$ , in Å) of the carbon cage in different lattices.

|                    | Ti   | V    | Cr   | Mn   | Fe   | Co   | Ni   |
|--------------------|------|------|------|------|------|------|------|
| M@C <sub>u</sub>   | 4.31 | 4.32 | 4.30 | 4.31 | 4.27 | 4.37 | 4.35 |
| M@C <sub>d</sub>   | 4.33 | 4.33 | 4.31 | 4.30 | 4.27 | 4.39 | 4.37 |
| M@H <sub>1-u</sub> | 4.52 | 4.57 | 4.56 | 4.55 | 4.52 | 4.56 | 4.61 |
| M@H <sub>1-d</sub> | 4.54 | 4.56 | 4.55 | 4.55 | 4.54 | 4.53 | 4.53 |
| M@H <sub>2-u</sub> | 4.50 | 4.54 | 4.58 | 4.54 | 4.53 | 4.56 | 4.60 |
| M@H <sub>2-d</sub> | 4.53 | 4.56 | 4.53 | 4.54 | 4.54 | 4.50 | 4.47 |

**Table S4.** The energy barriers (eV) between phase I and II of M@C, M@H<sub>1</sub> and M@H<sub>2</sub> (M= Ti-Ni).

|                  | Ti    | V     | Cr    | Mn    | Fe    | Co    | Ni    |
|------------------|-------|-------|-------|-------|-------|-------|-------|
| M@C              | 0.077 | 0.041 | 0.010 | 0.163 | 0.001 | 0.559 | 0.306 |
| M@H <sub>1</sub> | 1.000 | 0.449 | 0.211 | 0.001 | 0.205 | 0.161 | 0.450 |
| M@H <sub>2</sub> | 0.597 | 0.779 | 0.423 | 0.001 | 0.186 | 0.011 | 0.501 |

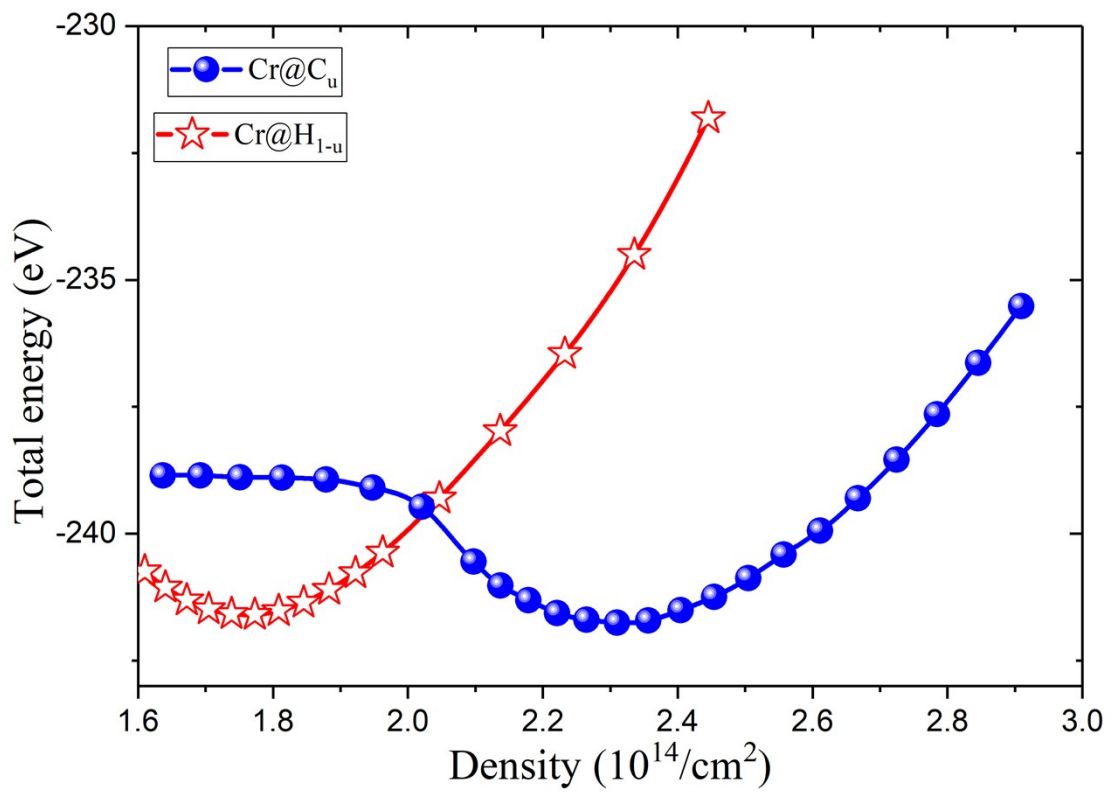

**Fig. S2.** Total energies of Cr@C<sub>u</sub> and Cr@H<sub>1-u</sub> versus the deposition density.



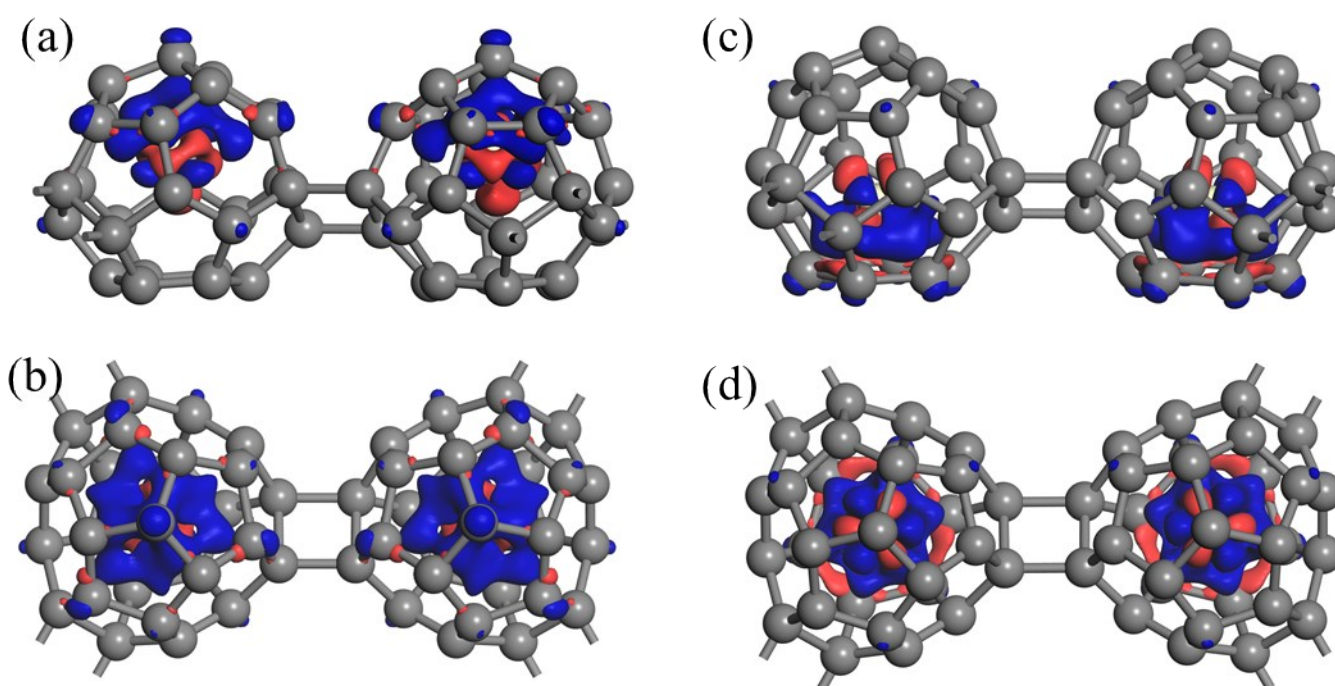

**Fig. S3** (a) and (b) The side and top views of the charge redistribution of Cr@H<sub>1-u</sub>. (c) and (d) The side and top views of the charge redistribution of Cr@H<sub>1-d</sub>. (Red and blue colors indicate charge depletion and accumulation, the isosurface is  $2.0 \times 10^{-3} e/\text{\AA}^3$ ).

**Table S5.** The exchange energies of M@C, M@H<sub>1</sub> and M@H<sub>2</sub> (M= V-Zn).

|                      |                     |                     |                    |                     |                     |                   |                     |                     |
|----------------------|---------------------|---------------------|--------------------|---------------------|---------------------|-------------------|---------------------|---------------------|
|                      | V@C <sub>u</sub>    | V@C <sub>d</sub>    | V@H <sub>1-d</sub> | V@H <sub>2-d</sub>  | Cr@C <sub>u</sub>   | Cr@C <sub>d</sub> | Cr@H <sub>1-u</sub> | Cr@H <sub>1-d</sub> |
| J <sub>1</sub> (meV) | 3.38                | 2.44                | 1.13               | 1.11                | 0.07                | 0.06              | 0.32                | 1.08                |
|                      | Cr@H <sub>2-u</sub> | Mn@C <sub>u</sub>   | Mn@C <sub>d</sub>  | Fe@H <sub>1-d</sub> | Fe@H <sub>2-d</sub> | Co@C <sub>d</sub> | Ni@C <sub>u</sub>   | Ni@C <sub>d</sub>   |
| J <sub>1</sub> (meV) | 3.38                | 1.28                | 1.53               | 5.76                | 0.108               | 0.21              | 0.35                | 3.19                |
|                      | Cu@C <sub>u</sub>   | Cu@H <sub>2-u</sub> | Zn@C <sub>u</sub>  |                     |                     |                   |                     |                     |
| J <sub>1</sub> (meV) | 1.12                | 1.18                | 1.33               |                     |                     |                   |                     |                     |

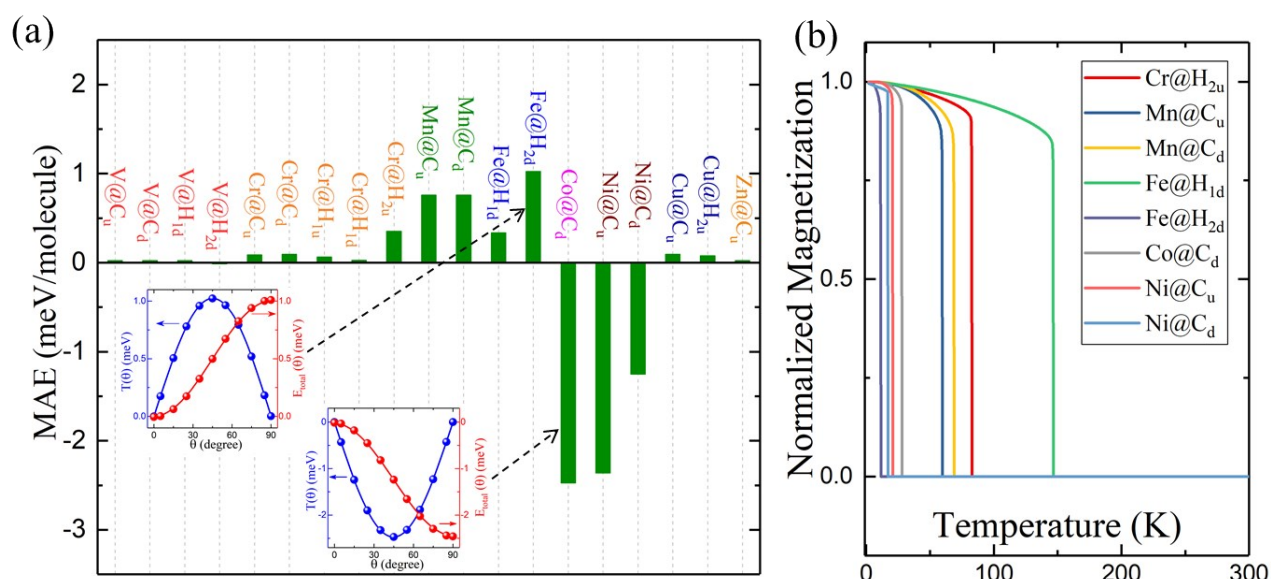

**Fig. S4** (a) and (b) The calculated MAEs and the renormalized magnetization as a function of temperature  $T$  for some 2D covalent crystals with ferromagnetic ordering.

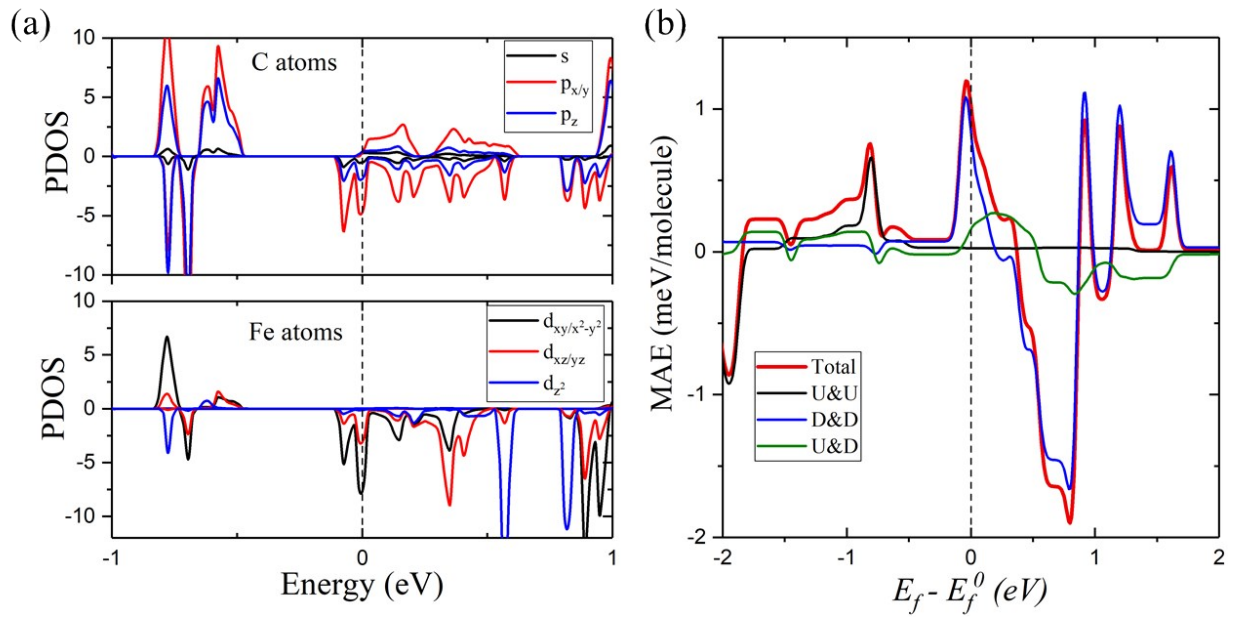

**Fig. S5** (a) and (b) The projected density of states (PDOS) and the Fermi level dependent total and spin channel decomposed MAEs of Fe@H<sub>2-d</sub>, respectively. One may see that the large perpendicular MAEs mostly stem from the SOC interaction between  $d_{xy/(x^2-y^2)\downarrow}$  and  $d_{xz/yz\downarrow}$  orbitals of Fe atom, and the cross-spin SOC interaction between  $p_{x/y\uparrow}$  and  $p_{x/y\downarrow}$  orbitals of the carbon cage also contributes. The total MAE is rather sensitive to the shift of the Fermi level, indicating a noteworthy magnetoelectric effect for this system, i.e., the MAEs can be effectively tuned by adjusting the position of the Fermi level.

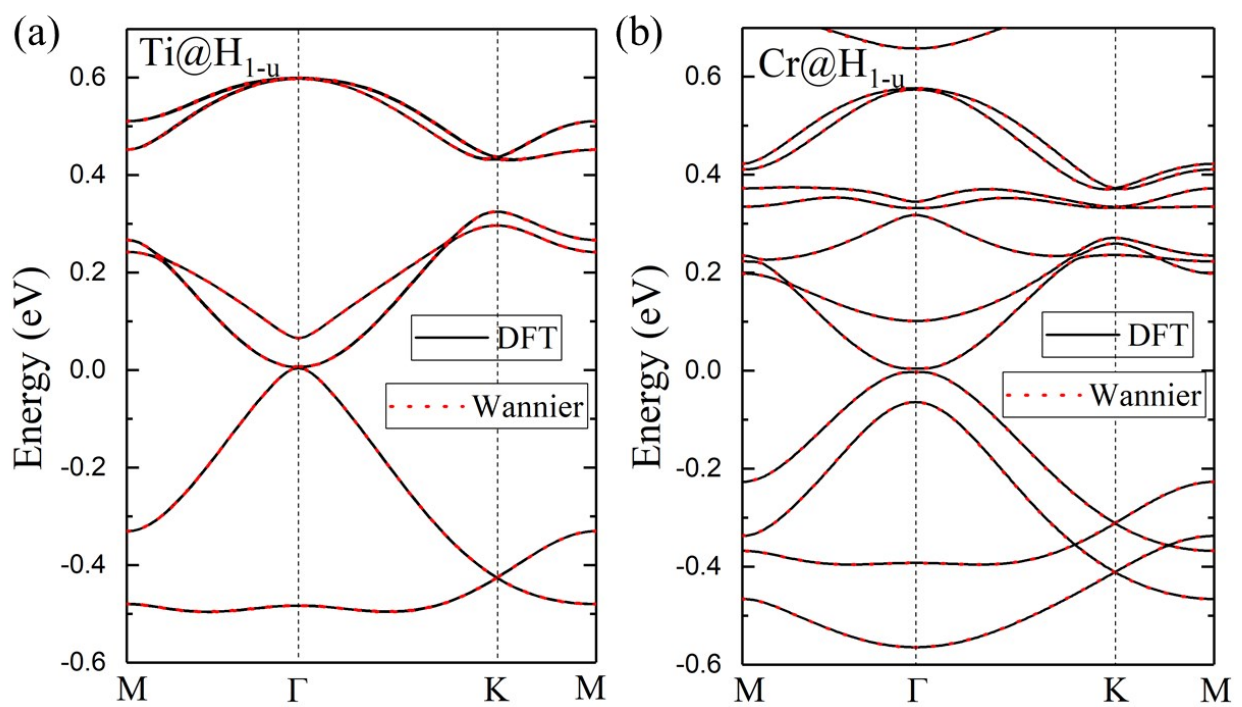

**Fig. S6** (a) and (b) The band structures of Ti@H<sub>1-u</sub> and Cr@H<sub>1-u</sub> from DFT calculations and the fitting band structures by using the Wannier90 package, respectively.

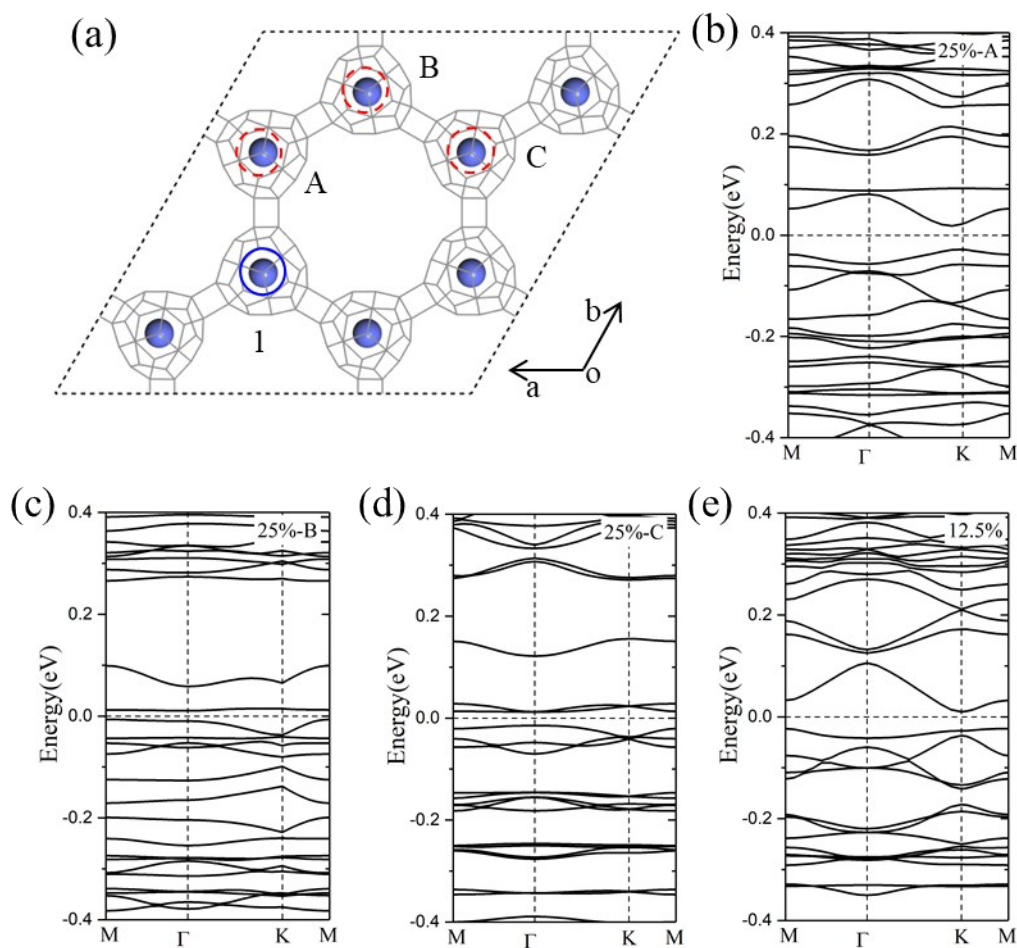

**Fig. S7** (a) Schematic phase transition of the of  $\text{Cr@H}_{1-u}$  lattice with two  $\text{Cr@C}_{28}$  molecules being converted to phase II (25%), one is at site 1 and the other randomly takes site A, B or C. (b)-(d) Their corresponding band structures. (e) The band structure of  $\text{Cr@H}_{1-u}$  with only one  $\text{Cr@C}_{28}$  molecule in the supercell being converted to phase II (12.5%).
